# Supplementary material for: The p53 Pathway and Outcome among Patients with T1G3 Bladder Tumors
Source: Oxford University Press journal article supplement (doi:10.1158/1078-0432.ccr-06-0206), 2006-10-15
Supplement: 10780432ccr060206-sup-supplementary_figure_2.pdf [file 10780432ccr060206-sup-supplementary_figure_2.pdf]

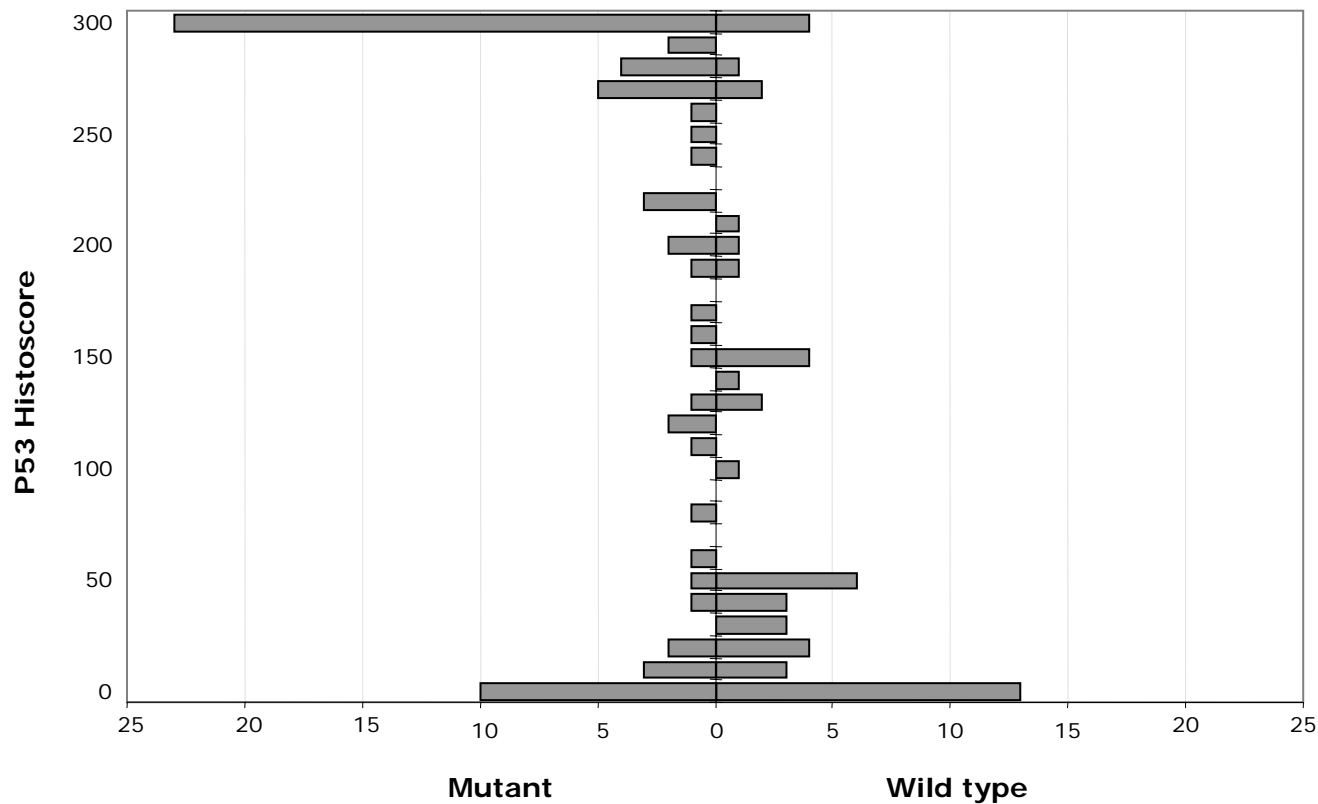

**Supplementary Figure 2. Comparison of Histoscore and *Tp53* mutant status.**

Immunoreactivity with antibody DO-7 was scored as indicated in Materials and Methods. The proportion of cells displaying no p53, +, ++, and +++ intensity reactions was assessed and a histoscore was calculated. Tumors were classified as mutant based on the presence of one or more pathogenic mutations. Histoscore does not accurately predict *Tp53* mutant status.
